# Supplementary material
Source: Springer Nature journal article supplement (https://www.springermedizin.de/resource/supplementary/13075_2009_2750_MOESM6_ESM.pdf/9692798)

CD14  
CD16

HC

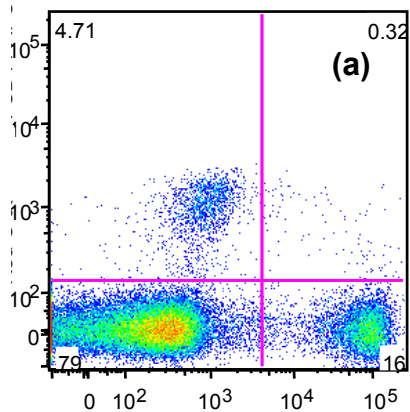

plain  
media

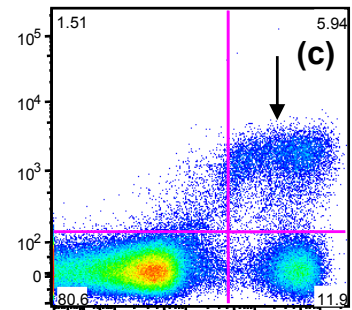

TNF $\alpha$

PsA

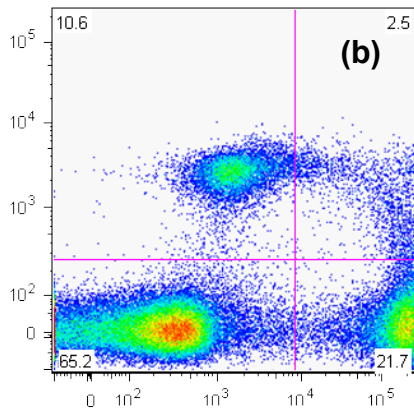

plain  
media

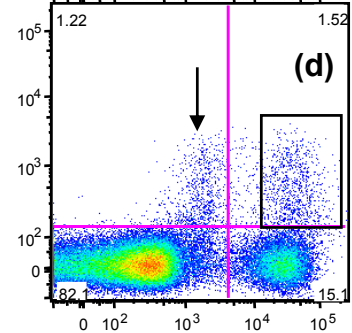

TNF $\alpha$

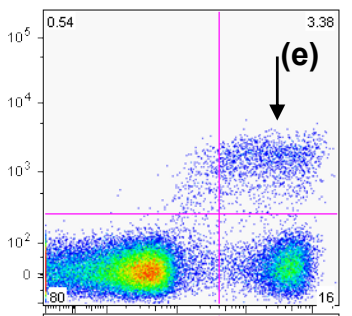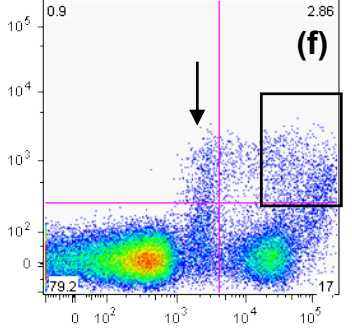

Supplement: MOESM6 [file 9692798]
